# Supplementary material for: Effects of Tebuconazole Application on Soil Microbiota and Enzymes
Source: MDPI journal article supplement (doi:10.3390/molecules27217501), 2022-11-03
Supplement: s1 [file s1]

# Effects of tebuconazole application on soil microbiota and enzymes

Małgorzata Baćmaga <sup>1</sup>, Jadwiga Wyszowska <sup>1,\*</sup>, Agata Borowik <sup>1</sup> and Jan Kucharski <sup>1</sup>

<sup>1</sup> Department of Soil Science and Microbiology; Faculty of Agriculture and Forestry; University of Warmia and Mazury in Olsztyn, Plac Łódzki 3, 10-727 Olsztyn, Poland

\* Correspondence: [jadwiga.wyszowska@uwm.edu.pl](mailto:jadwiga.wyszowska@uwm.edu.pl)

**Table S1.** Effect of tebuconazole on population numbers of microorganisms, 10<sup>n</sup> cfu kg<sup>-1</sup> soil d.m.

| Object    | Organotrophic bacteria<br>10 <sup>10</sup> cfu | Actinobacteria<br>10 <sup>10</sup> cfu | Fungi<br>10 <sup>8</sup> cfu |
|-----------|------------------------------------------------|----------------------------------------|------------------------------|
| C         | 1.599±0.077 <sup>e</sup>                       | 0.731±0.019 <sup>b</sup>               | 0.175±0.008 <sup>e</sup>     |
| T1        | 1.670±0.006 <sup>d</sup>                       | 0.987±0.011 <sup>a</sup>               | 0.327±0.006 <sup>d</sup>     |
| T2        | 2.052±0.017 <sup>c</sup>                       | 0.690±0.030 <sup>c</sup>               | 0.375±0.018 <sup>c</sup>     |
| T3        | 2.242±0.018 <sup>b</sup>                       | 0.630±0.027 <sup>cd</sup>              | 0.479±0.003 <sup>b</sup>     |
| T4        | 2.575±0.024 <sup>a</sup>                       | 0.630±0.028 <sup>cd</sup>              | 0.606±0.012 <sup>a</sup>     |
| $\bar{x}$ | 2.028                                          | 0.734                                  | 0.392                        |
| $r$       | 0.936 <sup>*</sup>                             | -0.617                                 | 0.912                        |

Tebuconazole doses in mg kg<sup>-1</sup>: C – control soil, T1 – 0.01 mg, T2 – 0.1 mg, T3 – 0.5 mg, T4 – 1.0 mg;  $r$  – simple Pearson's correlation coefficient significant at  $*p<0.05$ ,  $n=20$ ;  $\bar{x}$  – arithmetic mean;  $\pm$  – standard deviation. Homogeneous groups designated with the same letters (a-e) were calculated separately for each group of microorganisms.

**Table S2.** Values of Shannon-Wiener index and Simpson index computed based on all OTU data.

| Object               | Taxa              |                   |                   |                   |                              |
|----------------------|-------------------|-------------------|-------------------|-------------------|------------------------------|
|                      | Phylum            | Class             | Order             | Family            | Genus                        |
| Shannon-Wiener index |                   |                   |                   |                   |                              |
| C                    | 1.718±0.006<br>b  | 2.419±0.007<br>b  | 2.928±0.005<br>b  | 3.025±0.006<br>c  | 1.835±0.01<br>2 <sup>a</sup> |
| T1                   | 1.641±0.014<br>d  | 2.377±0.004<br>c  | 2.933±0.005<br>b  | 2.973±0.005<br>d  | 1.715±0.00<br>7 <sup>b</sup> |
| T2                   | 1.802±0.004<br>a  | 2.552±0.008<br>a  | 3.012±0.007<br>a  | 3.063±0.006<br>b  | 1.825±0.00<br>6 <sup>a</sup> |
| T3                   | 1.788±0.009<br>a  | 2.566±0.003<br>a  | 3.032±0.005<br>a  | 3.106±0.003<br>a  | 1.851±0.01<br>3 <sup>a</sup> |
| T4                   | 1.690±0.007<br>c  | 2.419±0.006<br>b  | 2.902±0.006<br>c  | 3.034±0.008<br>c  | 1.828±0.01<br>1 <sup>a</sup> |
| $\bar{x}$            | 1.728             | 2.467             | 2.961             | 3.040             | 1.811                        |
| $r$                  | 0.213             | 0.347             | 0.130             | 0.486             | 0.354                        |
| Simpson index        |                   |                   |                   |                   |                              |
| C                    | 0.737±0.006<br>ab | 0.688±0.006<br>bc | 0.748±0.010<br>c  | 0.655±0.006<br>a  | 0.355±0.01<br>6 <sup>a</sup> |
| T1                   | 0.710±0.008<br>b  | 0.661±0.010<br>c  | 0.798±0.007<br>a  | 0.610±0.006<br>b  | 0.263±0.00<br>9 <sup>c</sup> |
| T2                   | 0.764±0.006<br>a  | 0.718±0.013<br>a  | 0.763±0.006<br>bc | 0.628±0.010<br>ab | 0.330±0.00<br>7 <sup>a</sup> |
| T3                   | 0.757±0.004<br>a  | 0.716±0.009<br>a  | 0.794±0.007<br>ab | 0.623±0.008<br>b  | 0.298±0.01<br>2 <sup>b</sup> |
| T4                   | 0.731±0.009<br>ab | 0.700±0.008<br>ab | 0.764±0.006<br>bc | 0.634±0.005<br>ab | 0.347±0.00<br>8 <sup>a</sup> |
| $\bar{x}$            | 0.740             | 0.697             | 0.773             | 0.630             | 0.319                        |
| $r$                  | 0.257             | 0.534             | 0.205             | -0.277            | 0.079                        |

Tebuconazole doses in mg kg<sup>-1</sup>: C – control soil, T1 – 0.01 mg, T2 – 0.1 mg, T3 – 0.5 mg, T4 – 1.0 mg;  $r$  – simple Pearson's correlation coefficient significant at \* $p$ <0.05, n=20;  $\bar{x}$  – arithmetic mean;  $\pm$  – standard deviation. Homogeneous groups designated with the same letters (a-d) were calculated separately for each group of microorganisms.

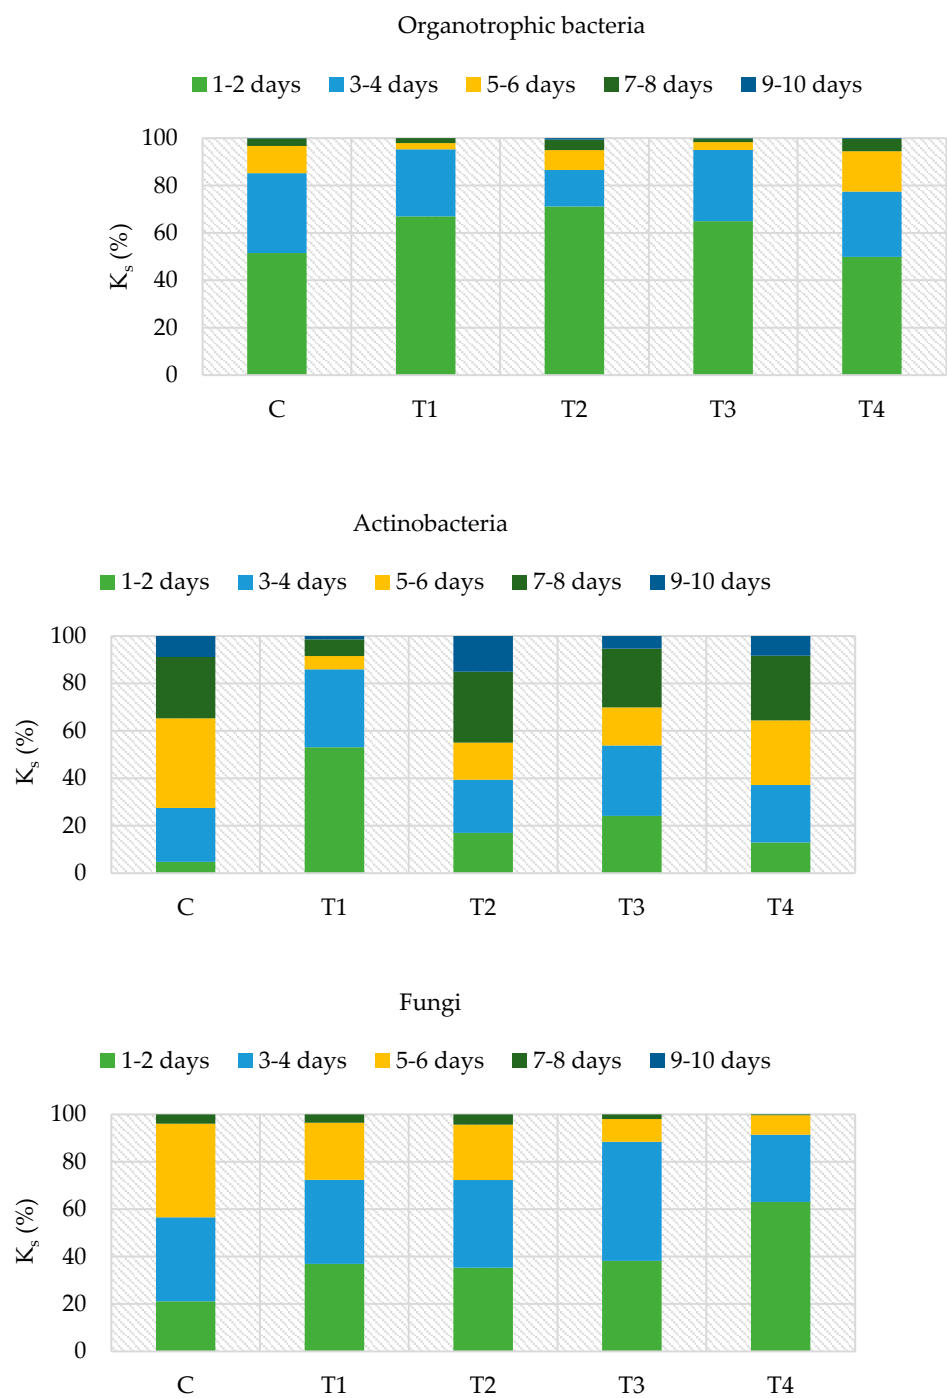

**Figure S1.** Increase in the abundance of microorganisms in various time intervals, in % ( $K_s$ ). Tebuconazole doses in  $\text{mg kg}^{-1}$ : C – control soil, T1 – 0.01 mg, T2 – 0.1 mg, T3 – 0.5 mg, T4 – 1.0 mg.
